# Supplementary material for: Crystal Structure and Active Site Engineering of a Halophilic γ-Carbonic Anhydrase
Source: PubMed Central journal article supplement (PMC7199487; doi:10.3389/fmicb.2020.00742), 2020-04-28
Supplement: Data_Sheet_1.pdf [file Data_Sheet_1.pdf]

## **Crystal structure and active site engineering of a halophilic $\gamma$ -carbonic anhydrase**

Malvina Vogler<sup>1,2,\*</sup>, Ram Karan<sup>1,\*</sup>, Dominik Renn<sup>1</sup>, Alexandra Vancea<sup>1</sup>, Marie-Theres Vielberg<sup>2</sup>, Stefan W. Grötzinger<sup>1</sup>, Priya DasSarma<sup>3</sup>, Shiladitya DasSarma<sup>3</sup>, Jörg Eppinger<sup>1</sup>, Michael Groll<sup>2\*</sup>, Magnus Rueping<sup>1\*</sup>

<sup>1</sup>King Abdullah University of Science and Technology (KAUST), KAUST Catalysis Center (KCC), Thuwal 23955-6900, Saudi Arabia

<sup>2</sup>Technische Universität München (TUM), Center for Integrated Protein Science Munich at the Department Chemistry, Garching 85748, Germany

<sup>3</sup>Department of Microbiology and Immunology, University of Maryland School of Medicine, and Institute of Marine and Environmental Technology, Baltimore, MD 21202 USA

**Table S1. Crystallographic data collection and refinement statistics.**

| <u><math>\gamma</math>-CA</u>                          |                      |
|--------------------------------------------------------|----------------------|
| <b><u>Crystal parameters</u></b>                       |                      |
| Space group                                            | F432                 |
| Cell constants                                         | a= 362.4 Å           |
| Subunits / AU <sup>a</sup>                             | 5                    |
| <b><u>Data collection</u></b>                          |                      |
| Beam line                                              | X06SA, SLS           |
| Wavelength (Å)                                         | 1.28                 |
| Resolution range (Å) <sup>b</sup>                      | 50 - 2.6 (2.7 - 2.6) |
| No. observed reflections                               | 848,244              |
| No. unique reflections <sup>c</sup>                    | 118535               |
| Completeness (%) <sup>b</sup>                          | 100 (100)            |
| R <sub>merge</sub> (%) <sup>b, d</sup>                 | 8.5 (57.5)           |
| I/σ (I) <sup>b</sup>                                   | 18.8 (3.3)           |
| <b><u>Refinement (REFMAC5)</u></b>                     |                      |
| Resolution range (Å)                                   | 30 - 2.6             |
| No. refl. working set                                  | 59,365               |
| No. refl. test set                                     | 3,124                |
| No. non hydrogen                                       | 7,548                |
| No. of metals                                          | 25                   |
| Solvent                                                | 611                  |
| R <sub>work</sub> / R <sub>free</sub> (%) <sup>e</sup> | 17.7 / 20.4          |
| r.m.s.d. bond (Å) / (°) <sup>f</sup>                   | 0.006 / 1.25         |
| Average B-factor (Å <sup>2</sup> )                     | 47.5                 |
| Ramachandran Plot (%) <sup>g</sup>                     | 98.0 / 1.8 / 0.2     |
| <hr/>                                                  |                      |
| PDB accession code                                     | 6SC4                 |

<sup>[a]</sup> Asymmetric unit

<sup>[b]</sup> The values in parentheses for resolution range, completeness, R<sub>merge</sub> and I/σ (I) correspond to the highest resolution shell

<sup>[c]</sup> Data reduction was carried out with XDS and from a single crystal. Friedel pairs were treated as individual reflections

<sup>[d]</sup>  $R_{\text{merge}}(I) = \frac{\sum_{\text{hkl}} \sum_j |I(\text{hkl})_j - \langle I(\text{hkl}) \rangle|}{\sum_{\text{hkl}} \sum_j I(\text{hkl})_j}$ , where  $I(\text{hkl})_j$  is the  $j^{\text{th}}$  measurement of the intensity of reflection hkl and  $\langle I(\text{hkl}) \rangle$  is the average intensity

<sup>[e]</sup>  $R = \frac{\sum_{\text{hkl}} (|F_{\text{obs}}| - |F_{\text{calc}}|)}{\sum_{\text{hkl}} |F_{\text{obs}}|}$ , where R<sub>free</sub> is calculated without a sigma cut off for a randomly chosen 5% of reflections, which were not used for structure refinement, and R<sub>work</sub> is calculated for the remaining reflections

<sup>[f]</sup> Deviations from ideal bond lengths/angles

<sup>[g]</sup> Percentage of residues in favored region / allowed region / outlier region

**Table S2. Homolog  $\gamma$ -CA structures as found and ranked by the DALI Server** (Holm and Rosenstrom, 2010). The proteins are classified according to their host organism being meso- or thermophilic and their sequence identity to CA\_D is given. (Note: homolog CA with the PDB ID 3r1w is not included as its source is unknown but presumably stems from a psychrophilic organism. As this is the only example for this class it is not included for statistical reasons.)

| PDB ID | RMSD(Holm and Rosenstrom, 2010) | Organism                             | Type (DSMZ)  | Sequence identity (Query cover) (Altschul et al., 1990; Altschul et al., 1997) [%] |
|--------|---------------------------------|--------------------------------------|--------------|------------------------------------------------------------------------------------|
| 3tio   | 0.9                             | <i>Escherichia coli</i>              | mesophilic   | 27 (96)                                                                            |
| 2fko   | 0.8                             | <i>Pyrococcus horikoshii</i>         | thermophilic | 43 (94)                                                                            |
| 3ixc   | 0.7                             | <i>Anaplasma phagocytophilum</i>     | mesophilic   | 36 (93)                                                                            |
| 3vnp   | 0.9                             | <i>Geobacillus kaustophilus</i>      | thermophilic | 32 (96)                                                                            |
| 1xhd   | 1.0                             | <i>Bacillus cereus</i>               | mesophilic   | 29 (96)                                                                            |
| 3r3r   | 1.4                             | <i>Salmonella enterica</i>           | mesophilic   | 28 (95)                                                                            |
| 4n27   | 1.0                             | <i>Brucella abortus</i>              | mesophilic   | 36 (98)                                                                            |
| 4mfg   | 1.2                             | <i>Clostridium difficile</i>         | mesophilic   | 37 (95)                                                                            |
| 1qrg   | 2.6                             | <i>Methanosarcina thermophila</i>    | thermophilic | 31 (75)                                                                            |
| 3kwc   | 1.5                             | <i>Thermosynechococcus elongatus</i> | thermophilic | 43 (82)                                                                            |

**Table S3. Interactions of CA\_D and homolog  $\gamma$ -CA structures.** The number of interactions is indicated within each monomer on the left side and the ones that are added by trimerization, meaning the interactions which were additionally added upon trimer formation, are displayed on the right side (HB: Hydrogen Bonds, SB: Salt Bridges). Hereby, CA\_D is compared to the average number of interactions in mesophilic and thermophilic homologs, while the single numbers per homolog are listed below each average. The highest value per row (CA\_D compared to the average values) is marked as **bold**. In the case of a substantial difference between CA\_D, the average values or the individual homologue values, the value is marked as **bold and underlined**.

| Enzyme                      | Contacts within monomer |           |           |           |             | Influence of trimerization |                  |           |           |             |
|-----------------------------|-------------------------|-----------|-----------|-----------|-------------|----------------------------|------------------|-----------|-----------|-------------|
|                             | HB                      | SB        | pi-pi     | cation-pi | Hydrophobic | HB                         | SB               | pi-pi     | cation-pi | Hydrophobic |
| <b>CA_D</b>                 | 162                     | <b>12</b> | 34        | <b>18</b> | 1014        | <b><u>69</u></b>           | <b><u>10</u></b> | 60        | 33        | 350         |
| <b>Mesophilic average</b>   | 167                     | 10        | 35        | 12        | 963         | 42                         | 5,5              | <b>68</b> | 33        | 324         |
| 3tio                        | 162                     | 13        | 39        | 16        | 1058        | 26                         | 7                | 103       | 40        | 265         |
| 3ixc                        | 173                     | 8         | 39        | 11        | 892         | 36                         | 3                | 45        | 30        | 294         |
| 1xhd                        | 190                     | 12        | 34        | 8         | 974         | 49                         | 6                | 67        | 30        | 418         |
| 3r3r                        | 183                     | 15        | 24        | 20        | 1009        | 58                         | 9                | 81        | 24        | 323         |
| 4n27                        | 145                     | 6         | 38        | 12        | 897         | 49                         | 5                | 68        | 46        | 399         |
| 4mfg                        | 149                     | 8         | 33        | 6         | 945         | 31                         | 3                | 46        | 29        | 243         |
| <b>Thermophilic average</b> | <b>172</b>              | 9         | <b>52</b> | 15        | <b>1036</b> | 42                         | 5                | 58        | <b>34</b> | <b>392</b>  |
| 2fko                        | 153                     | 9         | 58        | 16        | 1068        | 45                         | 6                | 27        | 72        | 342         |
| 3vnp                        | 159                     | 14        | 28        | 8         | 944         | 44                         | 3                | 62        | 53        | 365         |
| 1qrg                        | 193                     | 6         | 52        | 12        | 1109        | 54                         | 6                | 30        | 6         | 381         |
| 3kwc                        | 183                     | 6         | 69        | 24        | 1024        | 23                         | 6                | 111       | 3         | 481         |

**Table S4. Activity of CA\_D variants.**

|        | WT    | Single mutants |       |       | Double mutants |            |            | Triple mutant | Quadruple Mutant |
|--------|-------|----------------|-------|-------|----------------|------------|------------|---------------|------------------|
|        | CA_D  | I46E           | K58Q  | H166N | I46E-K58Q      | K58Q-H166N | I46E-H166N | CA_D*         | CA_D*-D67E       |
| WAU/mg | 32.93 | 0.65           | 20.21 | 5.09  | -              | -          | -          | 566           | 583              |

**Table S5. Oligonucleotides used in this study.**

| Primer         | 5'-3' sequence                                      | Use                          |
|----------------|-----------------------------------------------------|------------------------------|
| 5'-O           | CGCAAGCTTGACGTCGTGCTCTCC<br>AGTTTC                  | Deletion of <i>icfA</i> gene |
| 5'-I           | GATCCGTGACGCGATTTTCGGGTCT<br>AGACTGGTTGCCCCGCCAGCAT |                              |
| 3'-I           | CCCGAAATCGCGTCACGGATCAC<br>TCGGCTCTGGAGTTACTAA      |                              |
| 3'-O           | CGCGAATTCACTCTCAGATCCGAC<br>GTCACG                  |                              |
| pRK.F          | GCTGGACTGCCTTTTCTTCG                                | Sequencing of CA_D gene      |
| pRK.R          | GTTACTCCACCGTCATTCAGC                               |                              |
| RK.CAA_I46E.1  | CGATGGTGATCTTCTCCTCGTCGG<br>CGCGGATGACG             | Mutation I46E                |
| RK.CAA_I46E.2  | CGTCATCCGCGCCGACGAGGAGA<br>AGATCACCATCG             |                              |
| RK.CAA K58Q.1  | ATGACGGCGTTGTCCTGGATGCA<br>GGTGTTCTTG               | Mutation K58Q                |
| RK.CAA K58Q.2  | CAAGAACACCTGCATCCAGGACA<br>ACGCCGTCAT               |                              |
| RK.CAA H166N.1 | CGAGCTCGGCGTTGGTGTCCGCCT<br>G                       | Mutation H166N               |
| RK.CAA H166N.2 | CAGGCCGACACCAACGCCGAGCT<br>CG                       |                              |

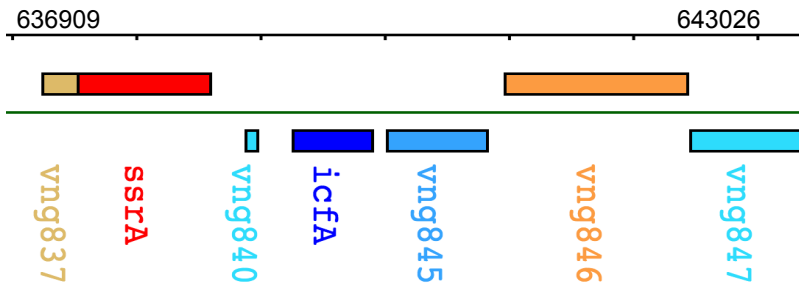

**Figure S1.** Location of the carbonic anhydrase gene (*icfA*) on the *Halobacterium* sp. NRC-1 chromosome (DasSarma et al., 2010).

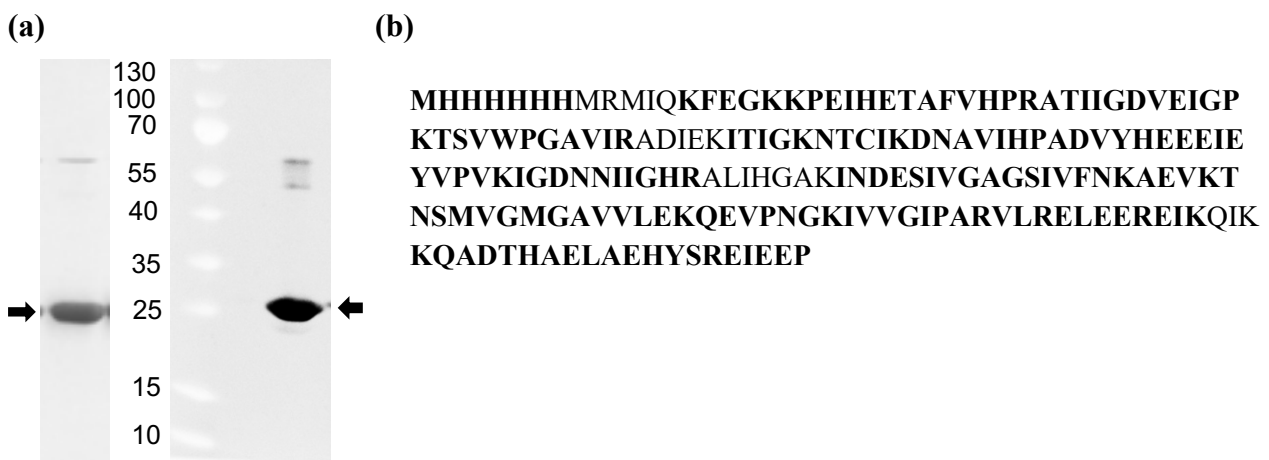

**Figure S2. Purification of CA\_D.** (a) Purification of CA\_D from *Halobacterium* sp. NRC-1 $\Delta$ *ura3* $\Delta$ *icfA* by Ni-Sepharose column. Purified fractions were electrophoresed on a 4-20 % polyacrylamide-SDS gel, and stained with Coomassie blue (left) and InVision His-tag In-gel Stain (right). SDS-PAGE and InVision His-tag In-gel stain analysis revealed a prominent single band with a molecular mass of ~26 kDa (calculated molecular weight of 21.1 kDa) (Figure S2A). The high apparent molecular mass anomaly was expected based on previously reported highly acidic haloarchaeal proteins (Karan et al., 2013; Karan et al., 2014). (b) Tryptic digest and LC-MS/MS analysis of CA\_D. Matched peptides are shown in *bold*. Sequence coverage was 89 %.

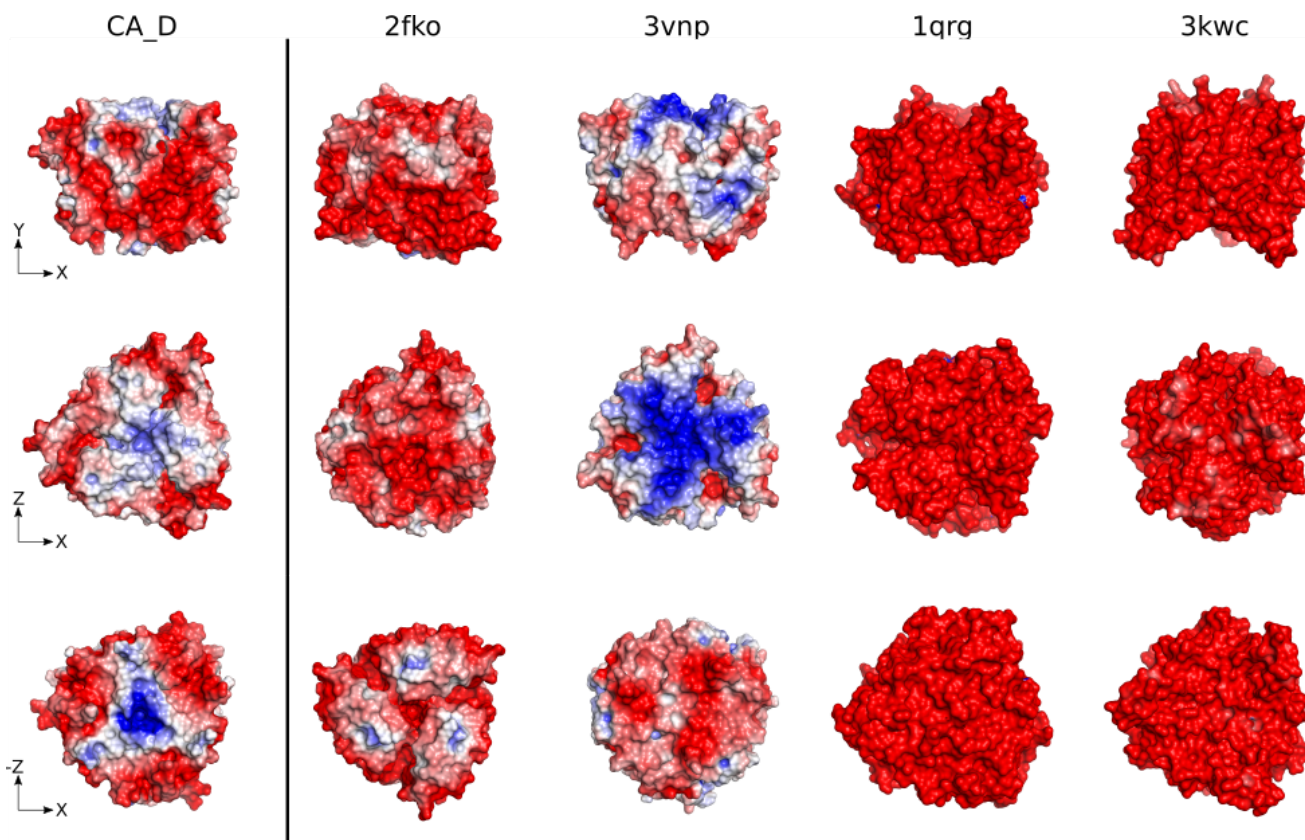

**Figure S3. Comparison of the electrostatic surface potential of CA\_D.** The electrostatic surface potential of the CA\_D trimer is compared to thermophilic homologs (*Pyrococcus horikoshii*, 2fko; *Geobacillus kaustophilus*, 3vnp; *Methanosarcina thermophile*, 1qrg; *Thermosynechococcus elongates*, 3kwc). All, except 3vnp show an increased negative surface charge. The electrostatic surface potential is color-coded from red (negative potential) to blue (positive potential). Unit -5 to +5  $k_B T/e$ .

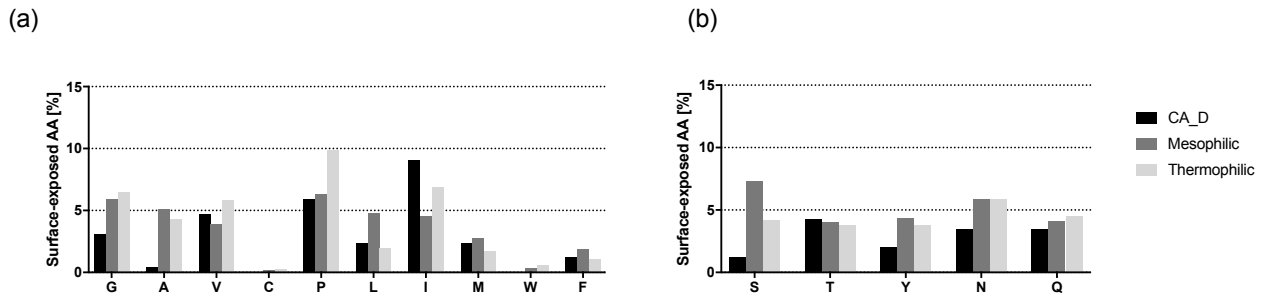

**Figure S4. Comparison of amino acid composition.** Single (a) hydrophobic and (b) polar surface-exposed amino acids between CA\_D and meso- and thermophilic homologs.

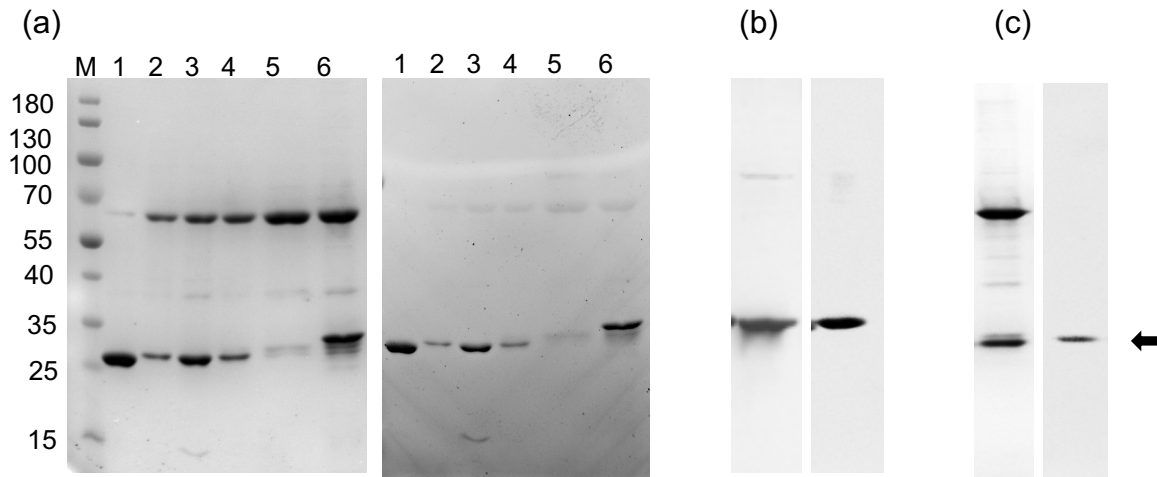

**Figure S5. Purification of CA\_D mutants.** Purification of CA\_D mutants from *Halobacterium* sp. NRC-1 $\Delta$ *ura3* $\Delta$ *icfA* by Ni-Sepharose column. Purified fractions were electrophoresed on a 4-20 % polyacrylamide-SDS gel, and stained with Coomassie blue (left) and InVision His-tag In-gel Stain (right). (a) Single and double variants, Lane 1. I46E, Lane 2. K58Q, Lane 3. H166N, Lane 4. I46E-K58Q, Lane 5. K58Q-H166N, Lane 6. I46E-H166N, (b) Triple variants CA\_D\* (I46E-K58Q-H166N). (c) Quadrepole variants CA\_D\*-D67E.



**I46E**

**MHHHHHHMRMIQKFEGKKPEIHETAFVHPRATIIGDVEIGPKTSVWPGAVIRADEEK  
ITIGKNTCIKDNAVHPADVYHEEEIEYVPVKIGDNNIIGHRALIHGAKINDESIVGAGSI  
VFNKAEVKTNSMVGMGAVVLEKQEVPNGKIVVGIPARVLRELEEREIKQIKKQADT  
HAELAEHYSREIEEP**

**K58Q**

**MHHHHHHMRMIQKFEGKKPEIHETAFVHPRATIIGDVEIGPKTSVWPGAVIRADIEK  
ITIGKNTCIQDNAVHPADVYHEEEIEYVPVKIGDNNIIGHRALIHGAKINDESIVGAGSI  
VFNKAEVKTNSMVGMGAVVLEKQEVPNGKIVVGIPARVLRELEEREIKQIKKQADTH  
AELAEHYSREIEEP**

**H166N**

**MHHHHHHMRMIQKFEGKKPEIHETAFVHPRATIIGDVEIGPKTSVWPGAVIRADIEK  
ITIGKNTCIKDNAVHPADVYHEEEIEYVPVKIGDNNIIGHRALIHGAKINDESIVGAGSI  
VFNKAEVKTNSMVGMGAVVLEKQEVPNGKIVVGIPARVLRELEEREIKQIKKQADT  
NAELAEHYSREIEEP**

**I46E-K58Q**

**MHHHHHHMRMIQKFEGKKPEIHETAFVHPRATIIGDVEIGPKTSVWPGAVIRADEEK  
ITIGKNTCIQDNAVHPADVYHEEEIEYVPVKIGDNNIIGHRALIHGAKINDESIVGAGSI  
VFNKAEVKTNSMVGMGAVVLEKQEVPNGKIVVGIPARVLRELEEREIKQIKKQADTH  
AELAEHYSREIEEP**

**I46E-H166N**

**MHHHHHHMRMIQKFEGKKPEIHETAFVHPRATIIGDVEIGPKTSVWPGAVIRADEEK  
ITIGKNTCIKDNAVHPADVYHEEEIEYVPVKIGDNNIIGHRALIHGAKINDESIVGAGSI  
VFNKAEVKTNSMVGMGAVVLEKQEVPNGKIVVGIPARVLRELEEREIKQIKKQADT  
NAELAEHYSREIEEP**

**K58Q-H166N**

**MHHHHHHMRMIQKFEGKKPEIHETAFVHPRATIIGDVEIGPKTSVWPGAVIRADIEK  
ITIGKNTCIQDNAVHPADVYHEEEIEYVPVKIGDNNIIGHRALIHGAKINDESIVGAGSI  
VFNKAEVKTNSMVGMGAVVLEKQEVPNGKIVVGIPARVLRELEEREIKQIKKQADT  
NAELAEHYSREIEEP**

**CA\_D\*(I46E-K58Q-H166N)**

**MHHHHHHMRMIQKFEGKKPEIHETAFVHPRATIIGDVEIGPKTSVWPGAVIRADEEK  
ITIGKNTCIQDNAVHPADVYHEEEIEYVPVKIGDNNIIGHRALIHGAKINDESIVGAGSI  
VFNKAEVKTNSMVGMGAVVLEKQEVPNGKIVVGIPARVLRELEEREIKQIKKQADT  
NAELAEHYSREIEEP**

**CA\_D\*-D67E**

**MHHHHHHMRMIQKFEGKKPEIHETAFVHPRATIIGDVEIGPKTSVWPGAVIRADEEKITI  
GKNTCIQDNAVHPADVYHEEEIEYVPVKIGDNNIIGHRALIHGAKINDESIVGAGSIVFNK**

**AEVKTNSMVGMGAVVLEKQEVNPKIVVGIPARVLRLEEREIKQIKKQADTNAELAEH  
YSREIEEP**

**Figure S6. Tryptic digest and LC-MS/MS analysis of CA\_D WT and variants.** Mutated amino acids are highlighted in green. Matched peptides are shown in *bold*. Sequence coverage was 85-94 %.

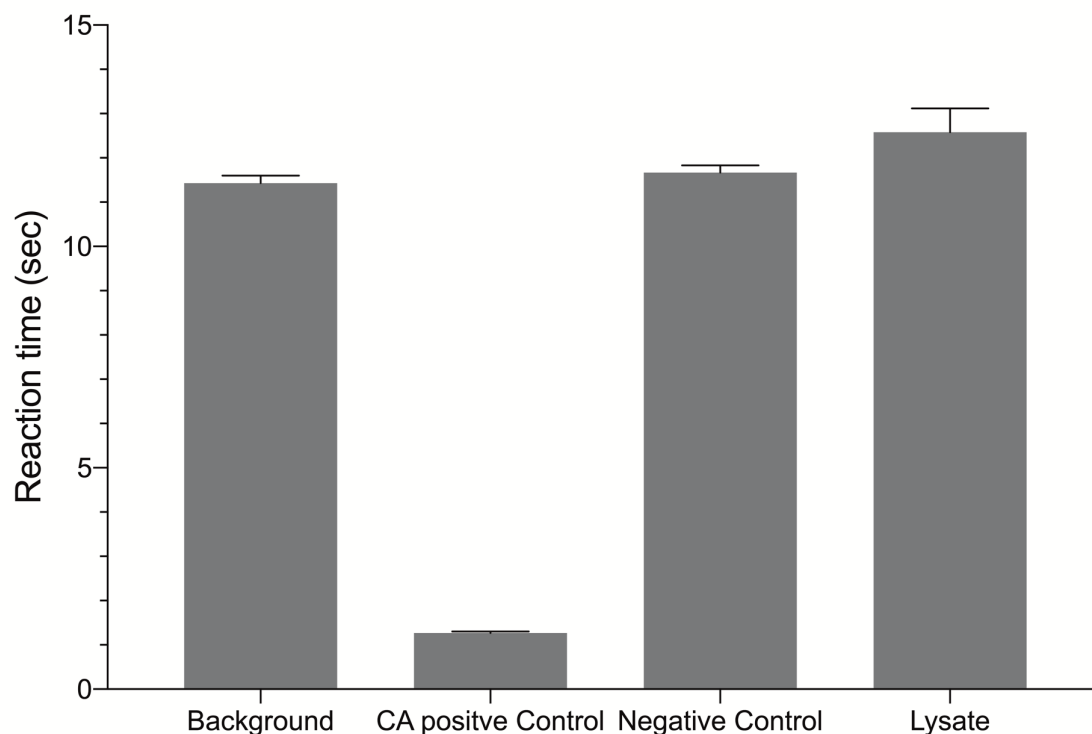

**Figure S7. Control Activity Measurements.** The reaction time until the activity plateau was reached was measured for the background reaction (Background) and the crude lysate (Lysate) of untransformed *Halobacterium* cells as well as for crude lysate which was purified on a Ni-NTA column (Negative) as a negative control. As a comparison, the reaction time was measured with the commercial carbonic anhydrase from bovine erythrocytes Sigma (St. Louis, MO, USA) as a positive control.

## SUPPLEMENTARY REFERENCES

- Altschul, S.F., Gish, W., Miller, W., Myers, E.W., and Lipman, D.J. (1990). Basic local alignment search tool. *Journal of Molecular Biology* 215(3), 403-410. doi: [https://doi.org/10.1016/S0022-2836\(05\)80360-2](https://doi.org/10.1016/S0022-2836(05)80360-2).
- Altschul, S.F., Madden, T.L., Schäffer, A.A., Zhang, J., Zhang, Z., Miller, W., et al. (1997). Gapped BLAST and PSI-BLAST: a new generation of protein database search programs. *Nucleic Acids Research* 25(17), 3389-3402. doi: 10.1093/nar/25.17.3389.
- DasSarma, S.L., Capes, M.D., DasSarma, P., and DasSarma, S. (2010). HaloWeb: the haloarchaeal genomes database. *Saline systems* 6, 12-12. doi: 10.1186/1746-1448-6-12.
- Holm, L., and Rosenstrom, P. (2010). Dali server: conservation mapping in 3D. *Nucleic Acids Res* 38(Web Server issue), W545-549. doi: 10.1093/nar/gkq366.
- Karan, R., Capes, M.D., DasSarma, P., and DasSarma, S. (2013). Cloning, overexpression, purification, and characterization of a polyextremophilic beta-galactosidase from the Antarctic haloarchaeon *Halorubrum lacusprofundi*. *BMC Biotechnol* 13, 3. doi: 10.1186/1472-6750-13-3.
- Karan, R., DasSarma, P., Balcer-Kubiczek, E., Weng, R.R., Liao, C.C., Goodlett, D.R., et al. (2014). Bioengineering radioresistance by overproduction of RPA, a mammalian-type single-stranded DNA-binding protein, in a halophilic archaeon. *Appl Microbiol Biotechnol* 98(4), 1737-1747. doi: 10.1007/s00253-013-5368-x.
